# Supplementary material for: Metronome use improves achievement of a target compression rate in out-of-hospital cardiac arrest: A retrospective analysis
Source: PubMed Central journal article supplement — Resusc Plus. 2023 Jun 23;15:100417. doi: 10.1016/j.resplu.2023.100417 (PMC10320236; doi:10.1016/j.resplu.2023.100417), 2023-06-23
Supplement: mmc1.pdf [file mmc1.pdf]

## **Supplemental Material - Metronome Use Improves Achievement of a Target Compression Rate in Out-Of-Hospital Cardiac Arrest**

Jacob Kennedy<sup>1</sup>, Kimberly Machado<sup>2</sup>, Charles Maynard PhD<sup>3</sup>, Robert G. Walker<sup>4</sup>, Michael R. Sayre MD<sup>2</sup>, Catherine R. Counts PhD MHA<sup>2</sup>

### **Table of Contents: Supplemental Material**

- i. Supplemental Table 1: Metronome Use
- ii. Supplemental Table 2: Compression Rates by Year
- iii. Supplemental Figure 1: CODESTAT Data Example
- iv. Supplemental Figure 2: Strobe Checklist

### Supplemental Table 1: Metronome Use

Metronome use by case and by minute for the study period.

| Supplemental Table 1: Metronome Use          |              |              |                 |                 |                 |                 |                 |                 |
|----------------------------------------------|--------------|--------------|-----------------|-----------------|-----------------|-----------------|-----------------|-----------------|
|                                              | 2013         | 2014         | 2015            | 2016            | 2017            | 2018            | 2019            | Overall         |
|                                              | n (%)        | n (%)        | n (%)           | n (%)           | n (%)           | n (%)           | n (%)           | n (%)           |
| <b>Total Cases</b>                           | 253          | 280          | 325             | 317             | 300             | 333             | 324             | 2,132           |
| Cases with No Metronome                      | 253          | 280          | 220 (67.7%)     | 140 (44.2%)     | 81 (27.0%)      | 31 (9.3%)       | 38 (11.7%)      | 1,043 (48.9%)   |
| Cases with a Metronome                       | -            | -            | 105 (32.3%)     | 177 (55.8%)     | 219 (73.0%)     | 302 (90.7%)     | 286 (88.3%)     | 1,089 (51.1%)   |
| <b>Total Minutes</b>                         | 3,114        | 3,998        | 4,813           | 4,422           | 4,926           | 5,715           | 5,788           | 32,776          |
| Minutes with No Metronome                    | 3,114        | 3,998        | 3,366 (70.0%)   | 2,176 (49.2%)   | 1,533 (31.1%)   | 707 (12.4%)     | 773 (13.3%)     | 15,667 (47.8%)  |
| Minutes with a Metronome                     | -            | -            | 1,447 (30.0%)   | 2,246 (50.8%)   | 3,393 (68.9%)   | 5,008 (87.6%)   | 5,015 (86.7%)   | 17,109 (52.2%)  |
|                                              | Median (IQR) | Median (IQR) | Median (IQR)    | Median (IQR)    | Median (IQR)    | Median (IQR)    | Median (IQR)    | Median (IQR)    |
| EMS Compressions to Metronome Start, minutes | -            | -            | 3.2 (1.1 - 5.9) | 1.8 (0.9 - 4.6) | 1.8 (0.9 - 3.8) | 1.1 (0.5 - 2.5) | 0.7 (0.3 - 1.6) | 1.3 (0.6 - 3.2) |

## Supplemental Table 2: Compression Rates by Year

Compression rates by year for the study period. P-values represent differences observed between compression rates by year for both no metronome and metronome minutes (year and compression rates were assessed separately by metronome use).

| Supplemental Table 2: Compression Rates by Year |                 |                 |                 |                 |                 |                 |                 |                 |                 |                 |                 |                 |                 |  |          |
|-------------------------------------------------|-----------------|-----------------|-----------------|-----------------|-----------------|-----------------|-----------------|-----------------|-----------------|-----------------|-----------------|-----------------|-----------------|--|----------|
| Year                                            | 2013            |                 | 2014            |                 | 2015            |                 | 2016            |                 | 2017            |                 | 2018            |                 | 2019            |  | <i>p</i> |
|                                                 | No<br>Metronome |  |          |
| Total minutes                                   | 3114            | 3998            | 3366            | 1447            | 2176            | 2246            | 1533            | 3393            | 707             | 5008            | 773             | 5015            |                 |  |          |
| Median Compression Rate                         | 114.3           | 113.1           | 113.2           | 110.2           | 111.7           | 110.4           | 112.4           | 110.6           | 112.2           | 110.6           | 111.0           | 110.6           | 0.0001          |  |          |
| IQR                                             | 108.2 - 121.0   | 107.4 - 119.4   | 108.3 - 119.3   | 109.7 - 112.0   | 108.1 - 117.5   | 109.8 - 112.3   | 109.4 - 117.4   | 110.1 - 112.2   | 109.5 - 118.1   | 110.1 - 112.0   | 110.0 - 115.0   | 110.1 - 111.9   |                 |  |          |
| Minutes over 120 CPM                            | 900             | 904             | 752             | 37              | 387             | 103             | 251             | 127             | 131             | 132             | 88              | 114             | <0.0001         |  |          |
| Minutes over 120 CPM, %                         | 28.9%           | 22.6%           | 22.3%           | 2.6%            | 17.8%           | 4.6%            | 16.4%           | 3.7%            | 18.6%           | 2.6%            | 11.4%           | 2.3%            |                 |  |          |
| Minutes under 100 CPM                           | 192             | 285             | 151             | 33              | 127             | 26              | 53              | 21              | 29              | 30              | 9               | 18              | <0.0001         |  |          |
| Minutes under 100 CPM, %                        | 6.2%            | 7.1%            | 4.5%            | 2.3%            | 5.8%            | 1.2%            | 3.5%            | 0.6%            | 4.1%            | 0.6%            | 1.2%            | 0.4%            |                 |  |          |

# Supplemental Figure 1: CODESTAT Data Example

Representative example of CODESTAT data output for one case.

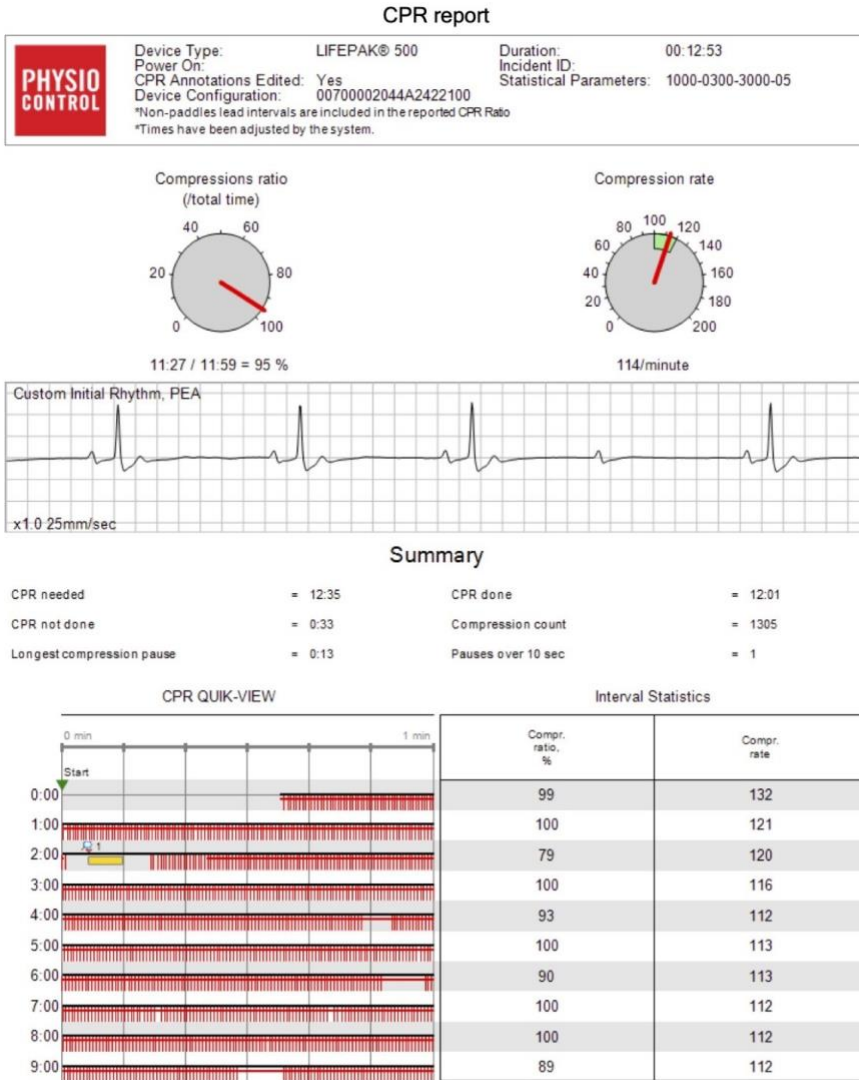

## Supplemental Figure 2: Strobe Checklist

STROBE Statement; checklist of items that should be included in reports of observational studies.

|                           | Item No | Recommendation                                                                                                                                  | Page No. in Manuscript |
|---------------------------|---------|-------------------------------------------------------------------------------------------------------------------------------------------------|------------------------|
| <b>Title and abstract</b> | 1       | (a) Indicate the study's design with a commonly used term in the title or the abstract                                                          | 1                      |
|                           |         | (b) Provide in the abstract an informative and balanced summary of what was done and what was found                                             | 2                      |
| <b>Introduction</b>       |         |                                                                                                                                                 |                        |
| Background/rationale      | 2       | Explain the scientific background and rationale for the investigation being reported                                                            | 3                      |
| Objectives                | 3       | State specific objectives, including any prespecified hypotheses                                                                                | 4                      |
| <b>Methods</b>            |         |                                                                                                                                                 |                        |
| Study design              | 4       | Present key elements of study design early in the paper                                                                                         | 4-5                    |
| Setting                   | 5       | Describe the setting, locations, and relevant dates, including periods of recruitment, exposure, follow-up, and data collection                 | 4-5                    |
| Participants              | 6       | (a) <i>Cohort study</i> —Give the eligibility criteria, and the sources and methods of selection of participants. Describe methods of follow-up | 4-6, Fig 1a,b          |

|                          |    |                                                                                                                                                                                                                                                                                                                              |                 |
|--------------------------|----|------------------------------------------------------------------------------------------------------------------------------------------------------------------------------------------------------------------------------------------------------------------------------------------------------------------------------|-----------------|
|                          |    | <p><i>Case-control study</i>—Give the eligibility criteria, and the sources and methods of case ascertainment and control selection. Give the rationale for the choice of cases and controls</p> <p><i>Cross-sectional study</i>—Give the eligibility criteria, and the sources and methods of selection of participants</p> |                 |
|                          |    | <p>(b) <i>Cohort study</i>—For matched studies, give matching criteria and number of exposed and unexposed</p> <p><i>Case-control study</i>—For matched studies, give matching criteria and the number of controls per case</p>                                                                                              | n/a             |
| Variables                | 7  | Clearly define all outcomes, exposures, predictors, potential confounders, and effect modifiers. Give diagnostic criteria, if applicable                                                                                                                                                                                     | 5-6             |
| Data sources/measurement | 8* | For each variable of interest, give sources of data and details of methods of assessment (measurement). Describe comparability of assessment methods if there is more than one group                                                                                                                                         | 5-6             |
| Bias                     | 9  | Describe any efforts to address potential sources of bias                                                                                                                                                                                                                                                                    | 6               |
| Study size               | 10 | Explain how the study size was arrived at                                                                                                                                                                                                                                                                                    | 6-7<br>Fig.1a,b |
| Quantitative variables   | 11 | Explain how quantitative variables were handled in the analyses. If applicable,                                                                                                                                                                                                                                              | 6               |

|                     |     |                                                                                                                                                                                                                                                                                                                   |                                         |
|---------------------|-----|-------------------------------------------------------------------------------------------------------------------------------------------------------------------------------------------------------------------------------------------------------------------------------------------------------------------|-----------------------------------------|
|                     |     | describe which groupings were chosen and why                                                                                                                                                                                                                                                                      |                                         |
| Statistical methods | 12  | (a) Describe all statistical methods, including those used to control for confounding                                                                                                                                                                                                                             | 6                                       |
|                     |     | (b) Describe any methods used to examine subgroups and interactions                                                                                                                                                                                                                                               | n/a                                     |
|                     |     | (c) Explain how missing data were addressed                                                                                                                                                                                                                                                                       | Figure 1a and 1b, Table 1 figure legend |
|                     |     | (d) <i>Cohort study</i> —If applicable, explain how loss to follow-up was addressed<br><br><i>Case-control study</i> —If applicable, explain how matching of cases and controls was addressed<br><br><i>Cross-sectional study</i> —If applicable, describe analytical methods taking account of sampling strategy | n/a                                     |
|                     |     | (e) Describe any sensitivity analyses                                                                                                                                                                                                                                                                             | n/a                                     |
| <b>Results</b>      |     |                                                                                                                                                                                                                                                                                                                   |                                         |
| Participants        | 13* | (a) Report numbers of individuals at each stage of study—eg numbers potentially eligible, examined for eligibility, confirmed eligible, included in the study, completing follow-up, and analysed                                                                                                                 | 6-7, Fig 1a,b                           |
|                     |     | (b) Give reasons for non-participation at each stage                                                                                                                                                                                                                                                              | n/a                                     |
|                     |     | (c) Consider use of a flow diagram                                                                                                                                                                                                                                                                                | Fig 1a, 1b                              |

|                  |     |                                                                                                                                                                                                              |                       |
|------------------|-----|--------------------------------------------------------------------------------------------------------------------------------------------------------------------------------------------------------------|-----------------------|
| Descriptive data | 14* | (a) Give characteristics of study participants (eg demographic, clinical, social) and information on exposures and potential confounders                                                                     | 6-7, Table 1          |
|                  |     | (b) Indicate number of participants with missing data for each variable of interest                                                                                                                          | Table 1 figure legend |
|                  |     | (c) <i>Cohort study</i> —Summarise follow-up time (eg, average and total amount)                                                                                                                             | n/a                   |
| Outcome data     | 15* | <i>Cohort study</i> —Report numbers of outcome events or summary measures over time                                                                                                                          | 6                     |
|                  |     | <i>Case-control study</i> —Report numbers in each exposure category, or summary measures of exposure                                                                                                         | n/a                   |
|                  |     | <i>Cross-sectional study</i> —Report numbers of outcome events or summary measures                                                                                                                           | n/a                   |
| Main results     | 16  | (a) Give unadjusted estimates and, if applicable, confounder-adjusted estimates and their precision (eg, 95% confidence interval). Make clear which confounders were adjusted for and why they were included | n/a                   |
|                  |     | (b) Report category boundaries when continuous variables were categorized                                                                                                                                    | Table 2               |
|                  |     | (c) If relevant, consider translating estimates of relative risk into absolute                                                                                                                               | n/a                   |



|                          |    |                                                                                                                                                                            |      |
|--------------------------|----|----------------------------------------------------------------------------------------------------------------------------------------------------------------------------|------|
|                          |    | risk for a meaningful time period                                                                                                                                          |      |
| Other analyses           | 17 | Report other analyses done—eg analyses of subgroups and interactions, and sensitivity analyses                                                                             | n/a  |
| <b>Discussion</b>        |    |                                                                                                                                                                            |      |
| Key results              | 18 | Summarise key results with reference to study objectives                                                                                                                   | 5-6  |
| Limitations              | 19 | Discuss limitations of the study, taking into account sources of potential bias or imprecision. Discuss both direction and magnitude of any potential bias                 | 9-10 |
| Interpretation           | 20 | Give a cautious overall interpretation of results considering objectives, limitations, multiplicity of analyses, results from similar studies, and other relevant evidence | 7-9  |
| Generalisability         | 21 | Discuss the generalisability (external validity) of the study results                                                                                                      | 7-9  |
| <b>Other information</b> |    |                                                                                                                                                                            |      |
| Funding                  | 22 | Give the source of funding and the role of the funders for the present study and, if applicable, for the original study on which the present article is based              | 1    |
